# Supplementary material for: Depth-resolved particle associated microbial respiration in the northeast Atlantic
Source: Copernicus journal article supplement (doi:10.5194/bg-2016-130), 2016-04-15
Supplement: Supplementary file 1 [file bg-2016-130-supplement.pdf]

1 **Supplementary Material**

2 **Figure S1: Example light microscope image of a) roller tank formed aggregate and b) in situ collected aggregate. Scale bars=0.5**  
 3 **mm.**

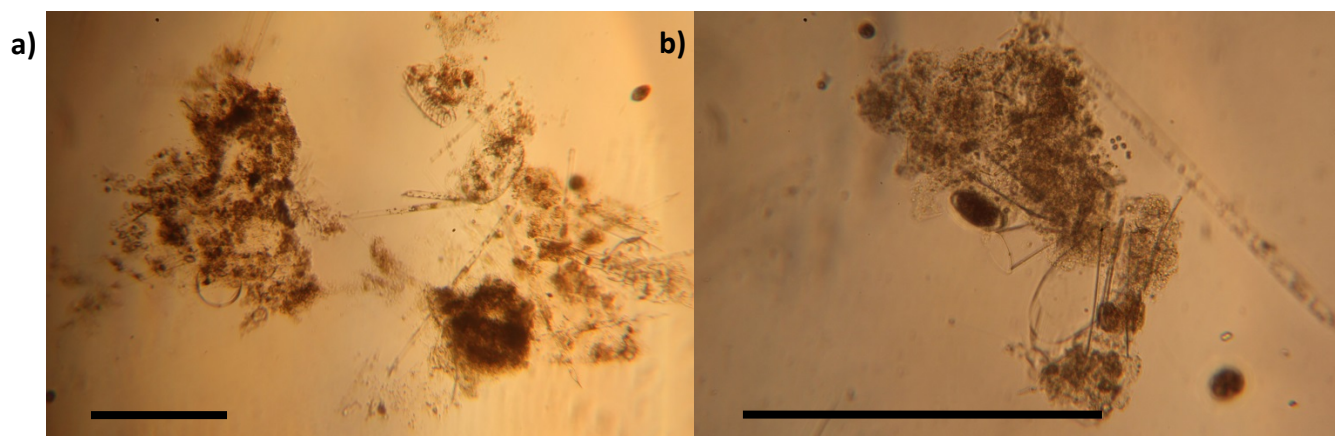

5 **Table S1: Particulate organic carbon (POC) content of marine snow aggregates (PA). PA were grouped into size classes for bulk**  
 6 **carbon measurement (see methods). ND=No Data**

7

| <i>Size range (ESD, mm)</i>    | <i>Aggregate POC (<math>\mu\text{g C mm}^{-3}</math>)</i> |                |              |            |
|--------------------------------|-----------------------------------------------------------|----------------|--------------|------------|
|                                | <i>&lt;0.6</i>                                            | <i>&gt;0.6</i> | <i>&lt;1</i> | <i>1-2</i> |
| <b><i>Sample Depth (m)</i></b> |                                                           |                |              |            |
| 12 (Roller tank)               |                                                           |                | 2.4          | 2.4        |
| 36                             | 17.0                                                      | 6.7            |              |            |
| 46                             | 30.6                                                      | 11.0           |              |            |
| 73                             | 15.0                                                      | 8.9            |              |            |
| 113                            | 16.5                                                      | 9.4            |              |            |
| 128                            | 11.7                                                      | ND             |              |            |
| 204                            | 14.2                                                      | ND             |              |            |
| 500                            | ND                                                        | ND             |              |            |

8
